# Supplementary figures and images for: Ancient Aleut personal names = Kadaangim Asangin, Asangis : materials from the Billings expedition 1790-1792
Source: Royal Society of Chemistry journal article supplement (doi:10.1039/b503828f), 1998-01-01

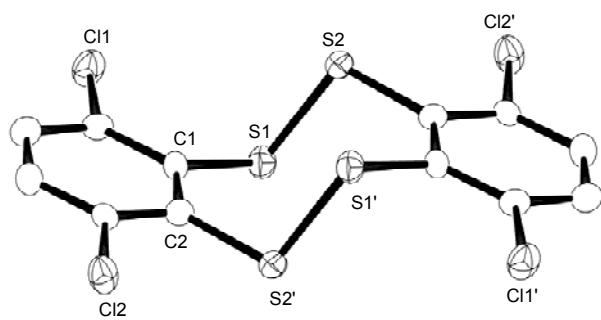

Figure S1. H. Sugimoto et al.

Supplement: s1.pdf [file s1.pdf]

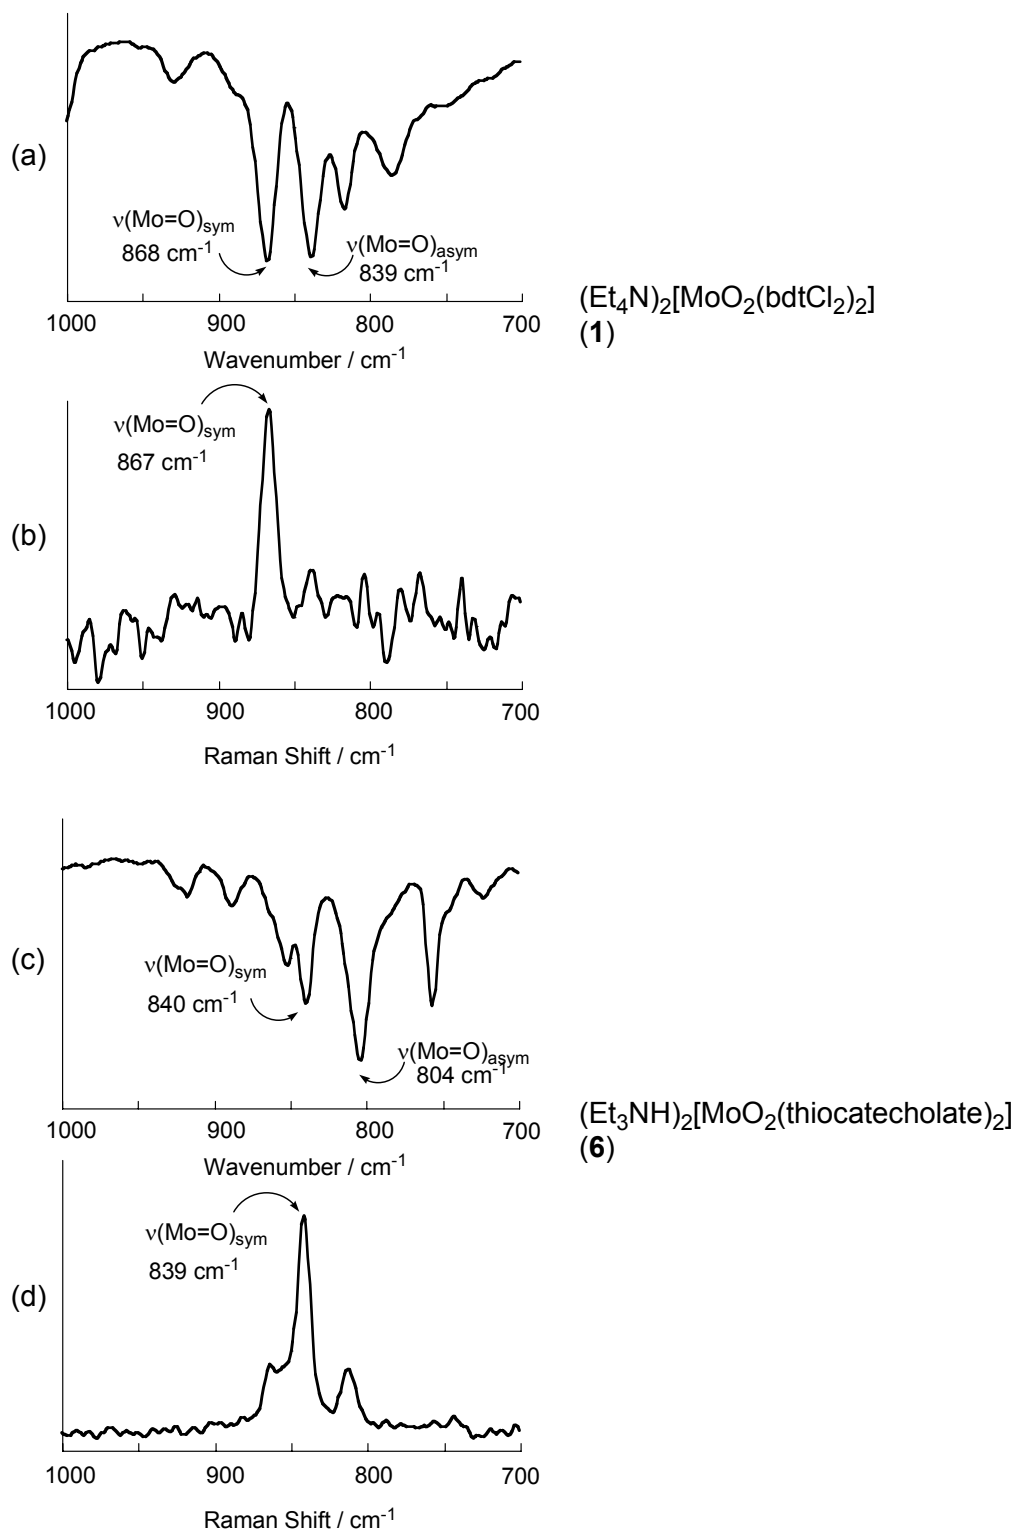

Figure S2. H. Sugimoto et al.

Supplement: s2.pdf [file s2.pdf]
